# Supplementary material for: A 2D hybrid nanocomposite: a promising anode material for lithium-ion batteries at high temperature
Source: Royal Society of Chemistry journal article supplement (doi:10.1039/d4na00424h), 2024-01-01
Supplement: d4na00424h1.pdf [file d4na00424h1.pdf]

# Supporting Information

## **2D Hybrid Nanocomposite: A Promising Anode Material for Lithium-ion Batteries at High Temperature**

*Bongu Chandra Sekhar*<sup>1</sup>, *Abdelrahman Soliman*<sup>1</sup>, *Muhammad Arsalan*<sup>2</sup>, and *Edreese H.  
Alsharaeh*\*<sup>1</sup>

<sup>1</sup> College of Science and General Studies, AlFaisal University, PO Box 50927, Riyadh,  
11533, Saudi Arabia

<sup>2</sup> EXPEC Advanced Research Center, Saudi Aramco, P.O. Box 5000, Dhahran, 31311, Saudi  
Arabia

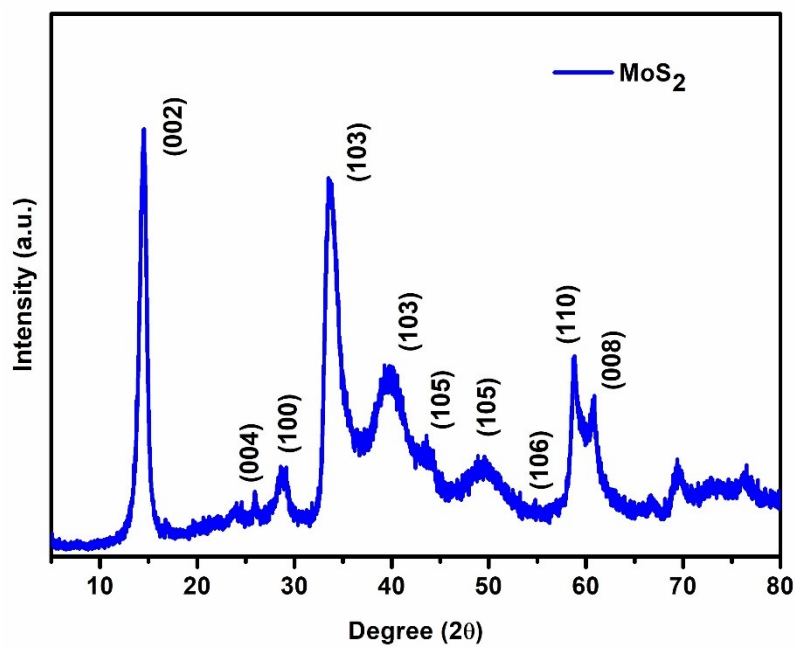

**Figure S1.** XRD of pure MoS<sub>2</sub>.

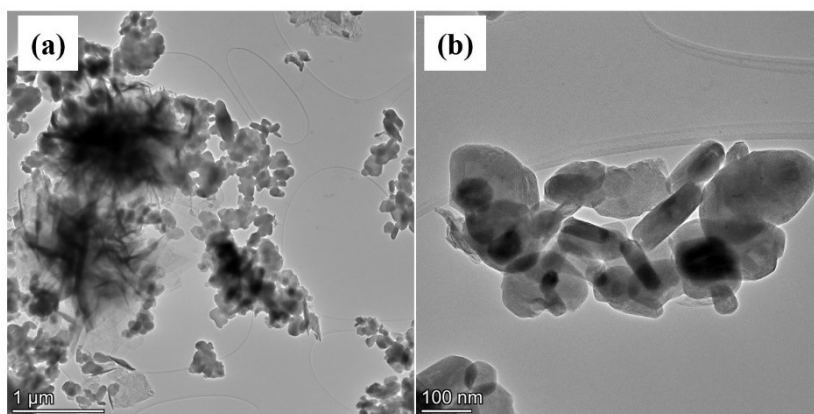

**Figure S2.** TEM images of pure MoS<sub>2</sub>.

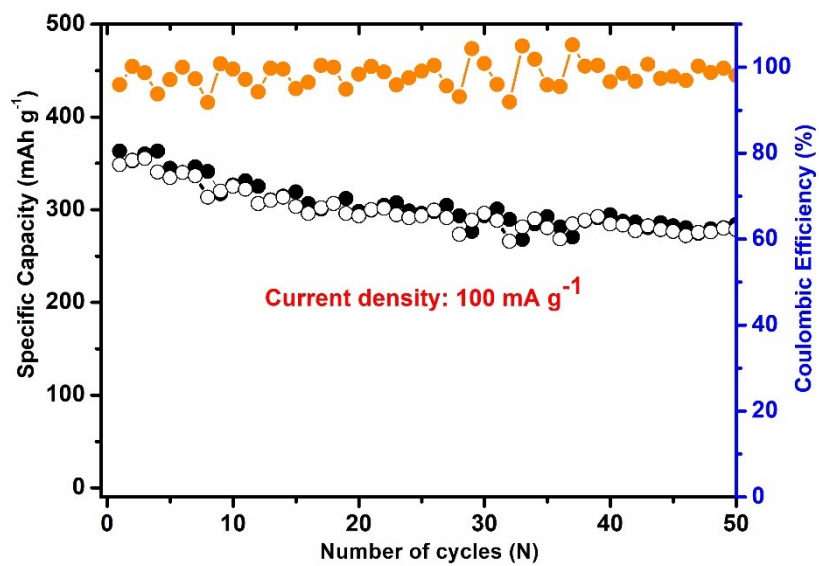

**Figure S3.** Long cycling performance of graphite at current density of 100 m A g<sup>-1</sup>.

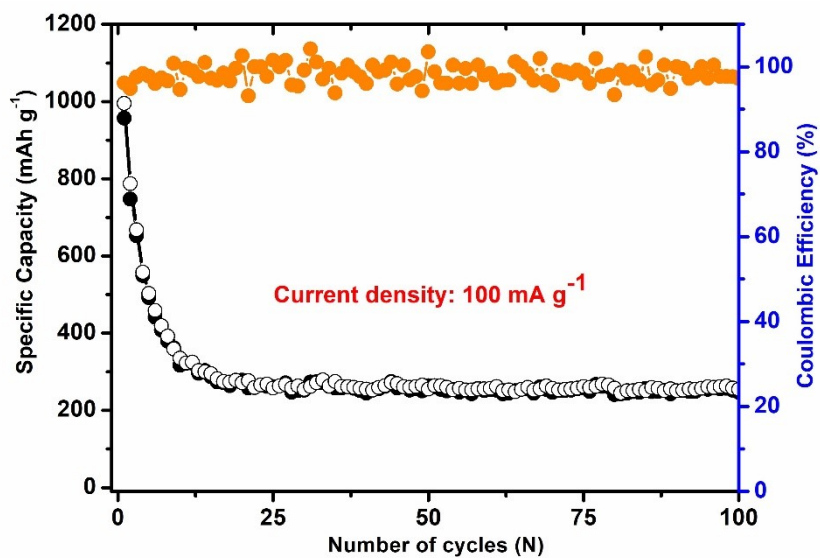

**Figure S4.** Long cycling performance of MoS<sub>2</sub> at current density of 100 m A g<sup>-1</sup>.

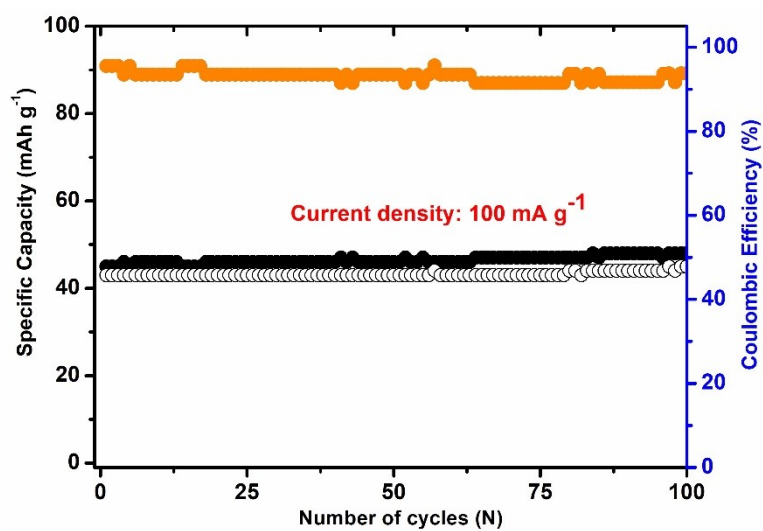

**Figure S5.** Long cycling performance of H-BN at current density of 100 m A g<sup>-1</sup>.

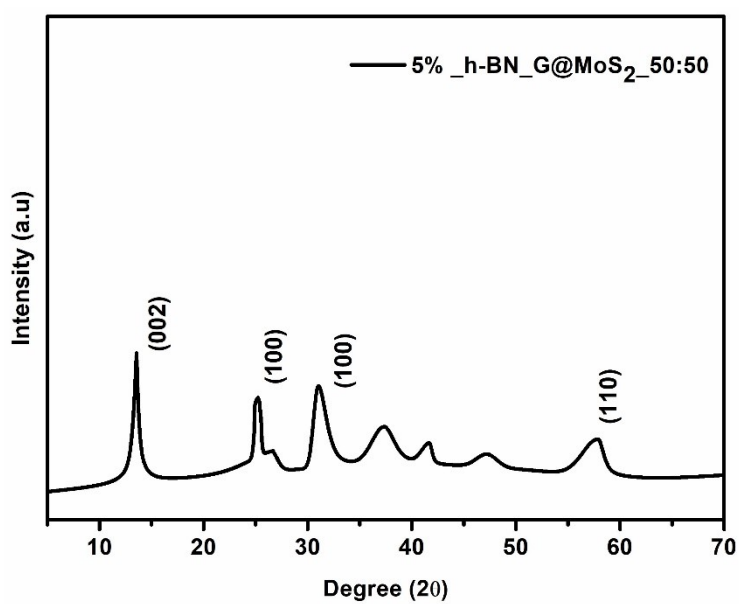

**Figure S6.** XRD analysis of the 5% BN-G@MoS<sub>2</sub>-50@50 composite electrode after cycling at 70 °C.

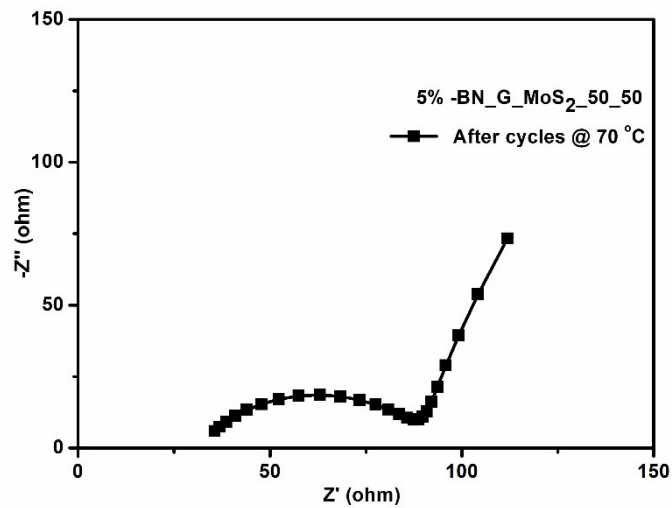

**Figure S7.** Nyquist plot of 5% BN-G@MoS<sub>2</sub>-50@50 composite electrode after cycles at high temperature.
